# Supplementary material for: Engrailed-2 promotes a malignant phenotype of esophageal squamous cell carcinoma through upregulating the expression of pro-oncogenic genes
Source: PeerJ. 2020 Feb 20;8:e8662. doi: 10.7717/peerj.8662 (PMC7036277; doi:10.7717/peerj.8662)
Supplement: Supplemental Information 4 [file peerj-08-8662-s004.xlsx]

## Sheet: 62 genes were upregulated in th
Supplemental Table S2. 62 genes were upregulated in the EN2-Eca109 cells as compared with the NEO-Eca109 cells, Related to Figure 5A.
Gene	Fold-Change	P.Value
SPARC	4.23204	0.000279609
FRZB	3.53299	0.000100743
AKR1C1	3.36569	0.000213569
EN2	3.25961	0.00819076
KLRC2	2.98693	0.00134638
AKR1C3	2.69318	0.000372727
CXCL11	2.57509	0.0271586
CRABP2	2.47872	0.00161213
SERPINB4	2.44741	0.046985
SMARCA1	2.32234	0.0254089
FAM107B	2.23572	0.0360117
KLRC1	2.17114	0.00481483
CTSS	2.11524	0.0398742
DKK3	2.09498	0.000156586
TMEM45A	2.07446	0.0321766
ST3GAL6	2.00218	0.0037857
KLRC3	1.98417	0.00466142
POPDC3	1.955	0.012626
PLCL2	1.94823	0.0220563
EVI2A	1.91925	0.0265889
DIO2	1.8807	0.00613541
C1S	1.85987	0.00682134
IL3RA	1.85485	0.0476956
HSD11B1	1.85411	0.0229199
ARHGAP31	1.84795	0.00192997
MX2	1.83831	0.00166254
ZNF780B	1.81644	0.0379164
MOCOS	1.8122	0.00298986
COL6A1	1.78293	0.00225117
GBP2	1.75977	0.0439071
PDE7B	1.7515	0.000710681
MAP2K6	1.74601	0.000326203
STEAP1	1.71146	0.0493209
IL2RG	1.69754	0.0375575
CSF2RA	1.68696	0.0198489
FAM124B	1.67481	0.00343915
CCDC122	1.67342	0.0103645
SH3KBP1	1.66359	0.0296581
LCA5L	1.65619	0.0390737
COL6A2	1.65111	0.0148128
IGFBP3	1.64319	0.00668151
NMRK1	1.63423	0.0478346
CD248	1.62763	0.0151413
OAS2	1.62489	0.0238961
FPR1	1.61856	0.0139356
OGFRL1	1.6011	0.0425077
C3AR1	1.59986	0.0107342
RHOXF1	1.59908	0.00520145
FLI1	1.58203	0.00869835
NAV1	1.57926	0.00166151
ADAMTS6	1.5546	0.0331969
TXNDC9	1.54956	0.0461869
IL2RB	1.54581	0.0152631
PKIA	1.54372	0.0167448
CDKL3	1.54292	0.0266852
FST	1.53985	0.0485856
BGN	1.53835	0.0459459
PDE3B	1.52982	0.0143172
ZNF20	1.52528	0.0230358
PRAMEF19	1.5173	0.0119041
LAMP3	1.51598	0.00426437
PRKAR2B	1.51598	0.0478621
IFI6	1.50885	0.00297109
