# Supplementary material for: Engrailed-2 promotes a malignant phenotype of esophageal squamous cell carcinoma through upregulating the expression of pro-oncogenic genes
Source: PeerJ. 2020 Feb 20;8:e8662. doi: 10.7717/peerj.8662 (PMC7036277; doi:10.7717/peerj.8662)
Supplement: Supplemental Information 5 [file peerj-08-8662-s005.xlsx]

## Sheet: 42 genes were downregulated in 
Supplemental Table S3. 42 genes were downregulated in the EN2-Eca109 cells as compared with the NEO-Eca109 cells, Related to Figure 5A.
Gene	Fold-Change	P.Value
BTBD16	-2.28778	0.00106409
MFAP5	-2.21997	0.0112612
ALPP	-2.04743	0.00397703
ALPPL2	-2.02692	0.00250217
CCND2	-2.01863	0.00355029
SLC12A3	-1.97173	0.0118224
LPAR1	-1.96646	0.000367589
PPM1L	-1.92568	0.00298738
DCLK1	-1.85938	0.0367795
CDH1	-1.85565	0.00908796
NRG1	-1.84821	0.0468639
SLC25A53	-1.77584	0.00342068
TMC5	-1.77488	0.00829578
TMPRSS15	-1.73215	0.043637
PON3	-1.72891	0.0223136
IL20	-1.70128	0.00323681
PADI3	-1.67974	0.0110069
NEURL1	-1.67134	0.0144943
EPCAM	-1.66524	0.0254239
NR2F2	-1.64034	0.00324707
ADRA1B	-1.64023	0.0135134
CORO6	-1.62911	0.021538
PSCA	-1.62521	0.0381847
TMEM95	-1.60934	0.0341708
MAGEB3	-1.6092	0.00928243
LSR	-1.5914	0.00909122
POSTN	-1.58659	0.0169137
REEP1	-1.58535	0.00150022
OR2G2	-1.56288	0.00167203
CMTM8	-1.55868	0.0467252
CD70	-1.55476	0.0158374
SOX15	-1.54683	0.0030325
IL24	-1.54487	0.0204933
ZNF474	-1.5361	0.0300377
ALPI	-1.53094	0.042789
SERPINE2	-1.52922	0.0051827
UCP2	-1.52819	0.0392629
SLC2A8	-1.52705	0.0443919
LRRC31	-1.52557	0.0255913
TRIB3	-1.51832	0.0180095
SLC12A8	-1.50755	0.045446
ARHGAP8	-1.50694	0.00336594
