# Supplementary material for: Engrailed-2 promotes a malignant phenotype of esophageal squamous cell carcinoma through upregulating the expression of pro-oncogenic genes
Source: PeerJ. 2020 Feb 20;8:e8662. doi: 10.7717/peerj.8662 (PMC7036277; doi:10.7717/peerj.8662)
Supplement: Supplemental Information 6 [file peerj-08-8662-s006.xlsx]

## Sheet: 131 genes were upregulated in t
Supplemental Table S4. 131 genes were upregulated in the EN2-Kyse150 cells as compared with the NEO-Kyse150 cells, Related to Figure S1A.
Gene	Fold-Change	P.Value
EN2	9.95913	0.000256918
IFI27	8.84376	0.00110469
IFI44L	8.3297	0.0125833
PIK3C2G	7.49266	0.0201062
TMPRSS11E	6.8861	0.000237595
MYO3B	5.6449	0.000540994
BST2	4.76538	0.0347874
MX2	4.68102	0.00784686
CFH	4.27294	0.000375022
OAS2	4.14098	0.00672267
DAPP1	3.93569	0.000262463
SPTLC3	3.75939	0.00148325
TRIM22	3.67921	0.00111267
IFI6	3.67882	0.000832755
TMEM27	3.57529	0.000768704
SLC16A3	3.52989	0.00297755
ZBTB20	3.21363	0.0204757
ABI3BP	3.18836	0.00349915
MMP13	3.10169	0.0196679
OAS1	3.093	0.0309524
CPED1	3.06506	0.0053246
CALCRL	2.98708	0.00343487
LGALS9	2.94692	0.0293479
STEAP1	2.84448	0.028302
APOL1	2.77485	0.0189114
IFITM1	2.74258	0.0228549
ALDOC	2.67282	0.00160778
DSEL	2.56742	0.0345782
TMEM156	2.4919	0.0236109
TIMP3	2.35541	0.00922653
HRASLS2	2.30883	0.0143662
RTP4	2.29726	0.0343386
MVB12A	2.29286	0.0133619
MYB	2.27162	0.00412423
SRPX2	2.22086	0.0416573
GBP1	2.20231	0.00671034
ECI2	2.17949	0.00385003
CXCL10	2.16125	0.0311796
DDIT4	2.14576	0.0460384
HERC5	2.12063	0.0210586
PRDX5	2.10216	0.0439374
PTHLH	2.09333	0.00660206
SP110	2.08854	0.00877969
LUM	2.02516	0.0150332
IL18BP	1.98651	0.0087804
IL1RL1	1.97611	0.0363748
MBOAT1	1.9658	0.00669596
DNAJC15	1.95132	0.0461597
DYNAP	1.94045	0.0124254
IL31RA	1.92854	0.00864764
MUC4	1.88655	0.0200814
SLC35E2B	1.88352	0.0143841
KRTAP25-1	1.87888	0.012414
TSPAN1	1.87634	0.023337
PARP9	1.83806	0.0483964
FBXO32	1.83605	0.0110971
TMOD1	1.82447	0.0137754
SSBP2	1.79775	0.0232049
SLC37A2	1.79753	0.0258122
TSKU	1.78963	0.0207185
TLE3	1.78779	0.0181926
MBL2	1.78456	0.0149187
DOCK4	1.7826	0.0152925
VAV3	1.77967	0.0156685
OAS3	1.77931	0.0301714
NR1I2	1.77686	0.0489435
F11	1.77441	0.0389839
KLF10	1.75903	0.0210503
HCN3	1.75781	0.029121
AGRN	1.75235	0.0394558
ALDH3B1	1.75114	0.047037
VPREB1	1.74885	0.0304701
PAK6	1.74703	0.0241179
GLRA2	1.73393	0.0318771
CNBD2	1.73257	0.0148639
ZNF133	1.73029	0.0207723
KCNMB1	1.71381	0.0355453
LRRC27	1.7115	0.0337733
SIPA1	1.71089	0.0176424
PDYN	1.70699	0.026982
SLC35E2	1.70555	0.0188588
SLC29A2	1.70335	0.0255463
TSPAN15	1.70287	0.0180806
SP140	1.69829	0.023268
KRTAP22-2	1.69211	0.0186867
KCNJ10	1.68851	0.0292871
HEY1	1.68826	0.0392615
HOGA1	1.68694	0.0246091
P2RY14	1.67325	0.0371291
ARRB2	1.67292	0.0352246
SYVN1	1.67238	0.0244595
TSC22D1	1.66759	0.0324788
SERPINB2	1.66247	0.033596
KLRC3	1.6527	0.042836
SCN11A	1.65096	0.0340188
CEACAM6	1.64765	0.028021
JARID2	1.63109	0.023098
LAMA5	1.62485	0.0251915
TCEAL3	1.62471	0.0320658
P2RY2	1.61936	0.035214
DERA	1.61146	0.0328898
NADK	1.60787	0.0271179
AKNAD1	1.60553	0.0324252
MROH2B	1.5939	0.0277345
DHX40	1.58707	0.0413643
TCP11L2	1.58674	0.0419862
RBMY1J	1.58553	0.047839
IL12B	1.58227	0.0384336
CEACAM21	1.56672	0.044307
SCN2A	1.56443	0.0453893
CHRNB3	1.5623	0.0315544
MYO1A	1.55844	0.0330282
TAS2R60	1.55767	0.0370492
SLC8A2	1.55276	0.0415502
NTS	1.55191	0.0474563
S100Z	1.5493	0.0484102
VEGFA	1.5462	0.0475437
KIF24	1.54499	0.0435287
FAM182B	1.54261	0.0359274
RBMY1D	1.5423	0.0368829
TNFSF13B	1.53516	0.0420993
NSUN5P1	1.53442	0.0441233
SIX6	1.5326	0.047305
ANPEP	1.53259	0.0498295
UNC79	1.5304	0.0412305
FOXN4	1.52706	0.038236
SLC38A7	1.52322	0.0460609
DUSP6	1.52036	0.041715
PER2	1.51911	0.0396196
FAM218A	1.51784	0.0409627
CCNL2	1.51456	0.0447676
GAREM1	1.51271	0.0441774
