# Supplementary material for: Engrailed-2 promotes a malignant phenotype of esophageal squamous cell carcinoma through upregulating the expression of pro-oncogenic genes
Source: PeerJ. 2020 Feb 20;8:e8662. doi: 10.7717/peerj.8662 (PMC7036277; doi:10.7717/peerj.8662)
Supplement: Supplemental Information 7 [file peerj-08-8662-s007.xlsx]

## Sheet: 249 genes were downregulated in
Supplemental Table S5. 249 genes were downregulated in the EN2-Kyse150 cells as compared with the NEO-Kyse150 cells, Related to Figure S1A.
Gene	Fold-Change	P.Value
TMPRSS15	-19.0831	0.000139157
CCDC88C	-8.00359	6e-05
FLG	-7.87534	0.0122443
SAA2	-7.77644	0.00515449
CRABP2	-6.74039	0.000458408
PDPN	-6.72742	0.00044859
IGFBP3	-6.54212	0.000237085
SLPI	-6.51442	0.00176716
SAA1	-6.3855	0.00433914
PLXDC2	-6.1296	9.59e-05
FST	-6.05149	0.000102402
GNE	-5.04463	0.00131739
SETD1B	-4.78422	0.000304267
ARSD	-4.64095	0.000511888
DAB2	-4.51655	0.000193528
GJB2	-4.49782	0.00529366
UBE2D4	-4.43251	0.000182696
MGAT4A	-4.41483	0.0137328
TMEM136	-4.33406	0.000398405
SERPINA1	-4.29729	0.00219369
BIRC3	-3.9647	0.0490107
MXRA5	-3.84093	0.000895671
RNF130	-3.76456	0.000486433
F2RL2	-3.71099	0.0133881
HIST1H1B	-3.70625	0.00171326
SORT1	-3.60797	0.000456974
NPAS2	-3.60345	0.00134304
CDON	-3.51856	0.00899653
ANK2	-3.45695	0.00562869
EHF	-3.45012	0.0014689
PCSK5	-3.39183	0.000520192
ICAM1	-3.35016	0.00352436
PLBD1	-3.25704	0.000513061
ANO2	-3.24298	0.00197848
KCNIP3	-3.20722	0.00527025
PPP2R2B	-3.19969	0.00242699
LCN2	-3.14361	0.0102019
FEZ1	-2.98731	0.0102752
PLAU	-2.9261	0.00192375
CKMT1B	-2.90036	0.00921426
CKMT1A	-2.89727	0.0077132
MAP3K8	-2.86044	0.00182146
PTPRM	-2.79106	0.00160887
SYNGR1	-2.78331	0.0043109
CYBRD1	-2.74942	0.00425553
S100A9	-2.69186	0.00550982
ARHGDIB	-2.66863	0.00213064
MPZL2	-2.62122	0.0132365
KRT14	-2.60252	0.0309632
GAB2	-2.58259	0.0035828
CMTM3	-2.57637	0.00273669
C3	-2.55958	0.0318066
CYP24A1	-2.51464	0.0141836
PACRG	-2.4845	0.00437068
TAPBPL	-2.40826	0.025333
PCDH7	-2.40703	0.00328364
VASH1	-2.3607	0.00460144
RGS5	-2.36011	0.034053
PPP1R14C	-2.35273	0.00446122
PSMB8	-2.3467	0.0304211
IL6	-2.34512	0.0478384
PKP1	-2.30543	0.0228771
PDZD2	-2.29124	0.0119064
ST3GAL5	-2.2674	0.00830533
BMPR1B	-2.21809	0.0388412
FAM118B	-2.2134	0.00514134
FAM129A	-2.20864	0.0203434
CRYL1	-2.1999	0.0203849
MGLL	-2.19446	0.00644936
TENM2	-2.18993	0.00897636
CPA4	-2.17058	0.0359255
EDARADD	-2.15737	0.00637205
NEDD4L	-2.15614	0.00637953
FAM105A	-2.14601	0.0473302
CA2	-2.14388	0.0100797
KIAA1549L	-2.13922	0.0078386
TNFAIP3	-2.13353	0.00877166
LCK	-2.11737	0.0482897
HYLS1	-2.10843	0.0349693
OLR1	-2.10739	0.0355586
TENM3	-2.09758	0.0151043
IGF2BP3	-2.09217	0.00973767
NREP	-2.09097	0.00683986
PFN2	-2.09025	0.0179596
HPSE	-2.08815	0.00822069
CLEC12A	-2.08491	0.0462441
DCTD	-2.07907	0.00664976
LYPD6B	-2.07496	0.00499427
HLA-DMA	-2.07295	0.0351571
ACOT4	-2.06429	0.00496871
NEURL1	-2.05693	0.0178906
PTS	-2.04575	0.0105118
LETM2	-2.03387	0.00753758
CBL	-2.01472	0.0133412
OSBP2	-2.00882	0.00802088
MEST	-2.00469	0.0251028
BLMH	-2.00439	0.00677553
REXO2	-2.00006	0.00925821
ITGBL1	-1.99909	0.0374067
USP2	-1.99351	0.0378971
SLC9A9	-1.98514	0.0166114
LYPD1	-1.98355	0.0245554
MERTK	-1.98224	0.00892951
CMTM8	-1.97459	0.0155044
ARG2	-1.95891	0.0100179
BCL11A	-1.95484	0.0137891
RANBP17	-1.95449	0.0290046
CASP4	-1.95137	0.0114409
FKBP11	-1.94536	0.0128505
ADORA1	-1.94297	0.00968629
NR2F2	-1.93566	0.0217206
HMBS	-1.93097	0.025432
ALDH2	-1.9072	0.00921196
DPP7	-1.90701	0.0306963
SLC9A3R2	-1.8983	0.014839
SPATC1L	-1.89669	0.0206419
ALG9	-1.89188	0.0141424
SLC35F2	-1.88733	0.0164622
SLAMF7	-1.88587	0.0168569
SERPINE2	-1.87803	0.0125755
RHOQ	-1.86737	0.0422232
PMP22	-1.862	0.0132164
SORCS2	-1.85889	0.0202451
NCR3LG1	-1.85637	0.0200672
P3H2	-1.85526	0.0105466
TMEM236	-1.8532	0.00962896
ARCN1	-1.8473	0.0438891
PITX2	-1.8459	0.0136451
PSTK	-1.84544	0.0244688
CAMK1D	-1.84291	0.0287478
LANCL2	-1.84207	0.0150567
CXCL8	-1.8321	0.0252232
GSR	-1.82678	0.0267422
NRSN2	-1.82435	0.0416903
SIK3	-1.82042	0.0138009
IL18	-1.81623	0.0116772
CHST4	-1.81138	0.0133958
SEC61A2	-1.80249	0.0126004
NT5DC3	-1.80168	0.0116667
IFT46	-1.79231	0.0202827
RALGPS1	-1.78724	0.016165
DCPS	-1.78248	0.0435968
ACAT1	-1.77361	0.0204542
VIM	-1.77354	0.0175538
FAM167A	-1.77016	0.0144607
KRT6A	-1.76518	0.0151761
LPAR5	-1.76492	0.0486646
MCMDC2	-1.76309	0.0462561
TNFRSF21	-1.76114	0.0302281
TGM2	-1.75761	0.0134078
DIXDC1	-1.7511	0.0350991
MRC2	-1.7486	0.0204101
NOL4L	-1.74858	0.0284946
RNF26	-1.74544	0.0275802
CCL20	-1.74533	0.0165815
STX11	-1.74437	0.0384006
NFRKB	-1.74434	0.0165631
PRKCB	-1.7383	0.017022
APLP2	-1.73595	0.0176869
GPR137B	-1.73288	0.031117
MAPK10	-1.73182	0.0229144
NELL2	-1.72137	0.0185455
GPRC5A	-1.71701	0.0249104
IGSF1	-1.71633	0.0260841
SRGN	-1.71385	0.0339101
KRT8	-1.71153	0.0221234
CEP164	-1.71125	0.0176419
FDX1	-1.71009	0.0179852
SLC24A3	-1.70623	0.0195582
SYT17	-1.70532	0.018707
IL1R1	-1.70343	0.0294442
HTR1D	-1.70255	0.0487941
REEP2	-1.69864	0.0308154
CREB3L2	-1.69629	0.0452417
ZMYND12	-1.69483	0.0471718
OPTN	-1.69231	0.0195007
GPR3	-1.68728	0.0217601
EXT1	-1.68477	0.0376852
ANO1	-1.68321	0.0254125
RPUSD4	-1.68157	0.0249003
EI24	-1.67725	0.0185626
KDELR3	-1.67438	0.0226082
HBEGF	-1.67335	0.0282032
TIRAP	-1.67331	0.0412955
BCL2L11	-1.67275	0.0349647
CACNG4	-1.67165	0.0387613
HMGB2	-1.66943	0.0238646
DBNDD2	-1.66467	0.0315603
CMYA5	-1.66306	0.0290952
PLAC8	-1.66188	0.0214431
SLCO3A1	-1.66141	0.0361172
IFNE	-1.65844	0.0224764
TGFA	-1.65717	0.0203849
FARP1	-1.65198	0.0483199
DUSP10	-1.64796	0.0210857
UGCG	-1.6442	0.0318303
SORL1	-1.64399	0.0486023
PROSER2	-1.64274	0.0379291
SPDYA	-1.64238	0.0331789
GDA	-1.64049	0.0426692
PAFAH1B2	-1.63864	0.0380236
SRPR	-1.63794	0.0257865
SPRY3	-1.63367	0.0467254
KIF4B	-1.62865	0.0309517
BACE2	-1.62808	0.0454878
TMEM218	-1.62806	0.024856
TMOD2	-1.62735	0.0493414
TAL2	-1.62668	0.0408252
TMEM25	-1.62407	0.0281761
SLC36A4	-1.62227	0.049235
ACYP2	-1.62148	0.0328386
VWA5A	-1.62041	0.0401721
SYS1-DBNDD2	-1.61573	0.0366317
MYOT	-1.60797	0.0281538
CCRL2	-1.60634	0.0325971
PARD6G	-1.60213	0.0323161
RAP1GAP2	-1.60179	0.0327666
KLF6	-1.59546	0.0477316
FAM205C	-1.59451	0.0329781
PARD3	-1.59268	0.0499884
CADM4	-1.59238	0.0493833
GATA3	-1.5873	0.0307658
CALB2	-1.58666	0.0495967
ZDHHC8	-1.58643	0.048654
FKBP5	-1.58133	0.0296696
PAPPA2	-1.58085	0.0339991
DCUN1D5	-1.57337	0.0326581
C4orf36	-1.57264	0.040919
CFHR2	-1.5696	0.0315639
IL33	-1.56907	0.0368895
INPP1	-1.55642	0.0355311
PTPRB	-1.5547	0.0483115
TRAPPC4	-1.55095	0.0482287
DNAJC1	-1.54842	0.0406171
BMP2	-1.54743	0.0361544
HACD1	-1.54628	0.0369488
SPATA16	-1.54432	0.0436886
FYN	-1.54096	0.0411302
PPT2	-1.54086	0.0380541
SYCP2L	-1.53951	0.0474153
STT3A	-1.53466	0.0397577
DNAH6	-1.53409	0.037735
TP53INP1	-1.5337	0.0480442
2020-03-04	-1.53198	0.0497275
SULF2	-1.52997	0.0456921
TMEM241	-1.52227	0.0459372
KIR2DL4	-1.52208	0.0434982
RNF212	-1.51344	0.047076
HYOU1	-1.508	0.04655
